# Supplementary material for: Multifunctional porous microspheres encapsulating oncolytic bacterial spores and their potential for cancer immunotherapy
Source: Royal Society of Chemistry journal article supplement (doi:10.1039/d3bm00635b), 2023-01-01
Supplement: d3bm00635b1.pdf [file d3bm00635b1.pdf]

*Supporting Information for*

## **Multifunctional Porous Microspheres Encapsulating Oncolytic Bacterial Spores and Its Potential for Cancer Immunotherapy**

### **Experimental methods**

***In vitro* colony formation assay:** The *in vitro* survival of CT26 cells in response to *C. novyi*-NT supernatant was assessed using a colony formation assay. Initially, 500 CT26 cells per well were seeded into a 6-well plate and incubated for 12 hours. Subsequently, the *C. novyi*-NT supernatant was added and the cells were further incubated for 7 days. Colonies were then fixed and stained with a mixture of 6% glutaraldehyde and 0.5% crystal violet. Finally, the colonies were counted, and representative images were taken.

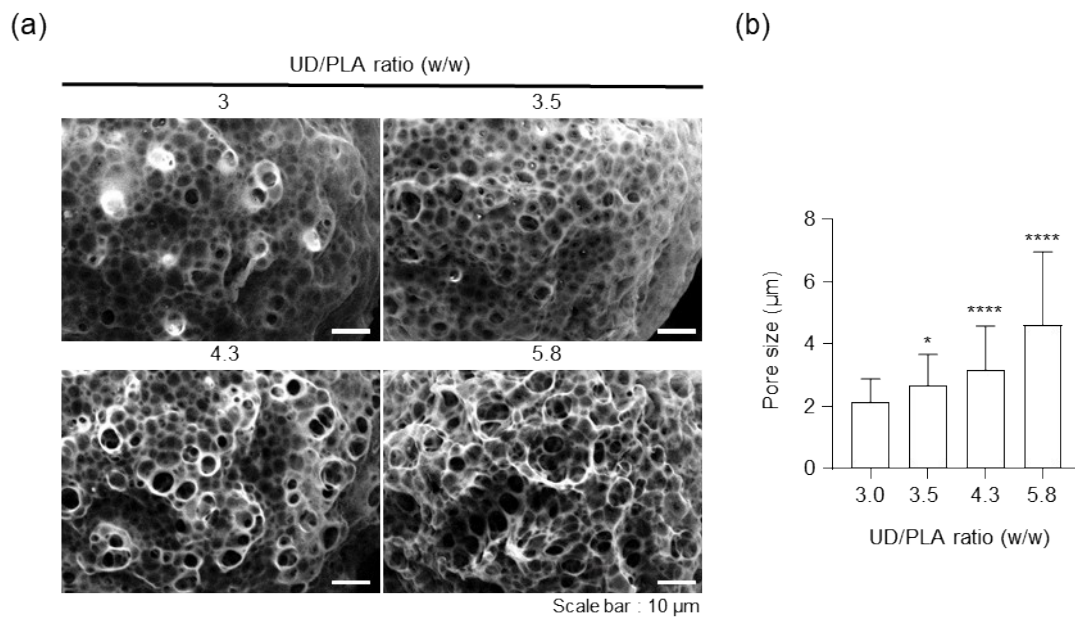

**Figure S1. Pore size analysis of microspheres prepared at various UD/PLA ratios (w/w).** (a) SEM images of the microsphere surface pores prepared at various UD/PLA ratios. (b) Bar graph analysis of the pore size obtained from the SEM images. Data are presented as the mean  $\pm$  SD ( $n = 100$ ,  $*p < 0.05$ ,  $****p < 0.0001$ ; ns, not significant).

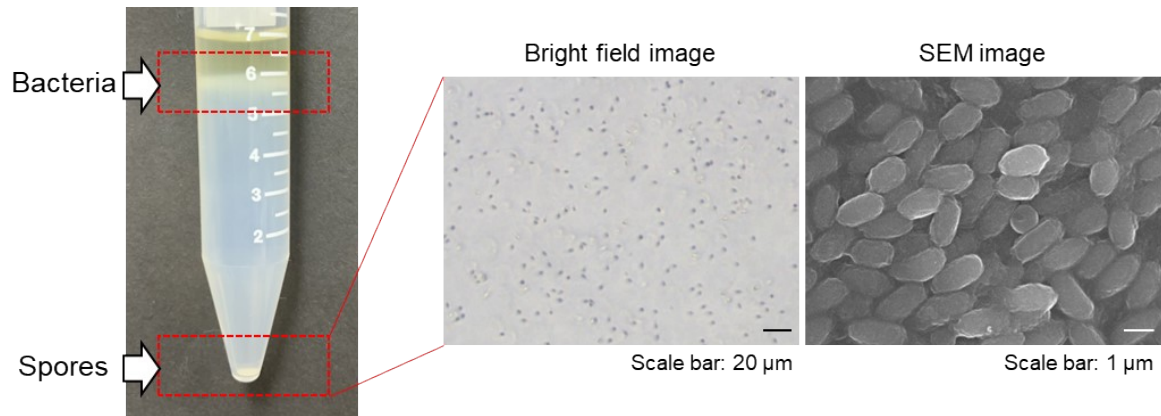

**Figure S2. *C. novyi*-NT spores isolated by Percoll density gradient separation.** A density gradient separation was performed in 55% and 70% Percoll in PBS solution with centrifugation (3000 rpm, 15 min, accel 0, and decel 0). After centrifugation, the isolated *C. novyi*-NT spores were separated. Bright field and SEM images were taken.

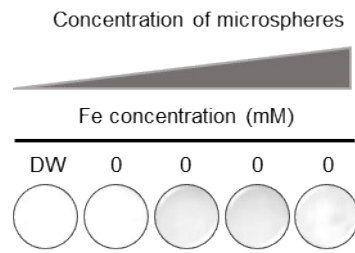

**Figure S3. *In vitro* T2-weighted MR phantom images of porous PLA microspheres without magnetic nanoparticles at various concentrations.**

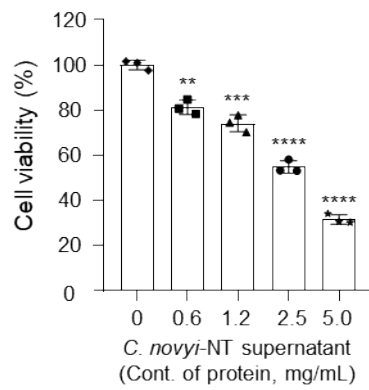

**Figure S4. *In vitro* cell viability of RAW 264.7 cells after treatment with culture supernatants (at various protein concentrations) of MPMs encapsulated with *C. novyi*-NT spores.** Data are presented as the mean  $\pm$  SD (n = 3, \*\* $p$  < 0.01, \*\*\* $p$  < 0.001, and \*\*\*\* $p$  < 0.0001).

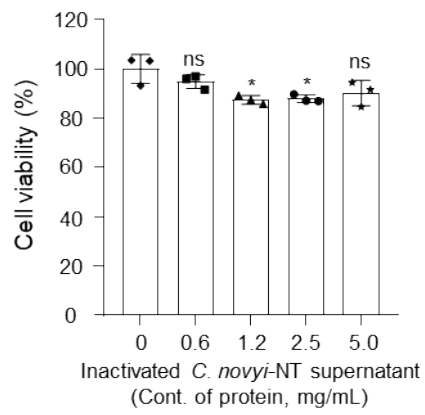

**Figure S5. *In vitro* cell viability of CT26 cells after treatment with heat-inactivated culture supernatants (at various protein concentrations) of MPMs encapsulated with *C. novyi*-NT spores. Data are presented as the mean  $\pm$  SD (n = 3, \* $p < 0.05$ ; ns, not significant).**

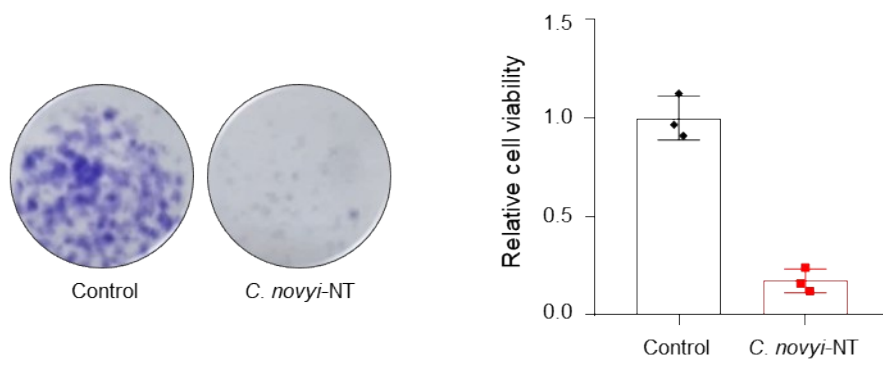

**Figure S6. *In vitro* colony formation assay of CT26 cells after treatment with culture supernatants of MPMs encapsulated with *C. novyi*-NT spores.**
